# Supplementary material for: Implementation of Precision Oncology for Patients with Metastatic Breast Cancer in an Interdisciplinary MTB Setting
Source: MDPI journal article supplement (doi:10.3390/diagnostics11040733), 2021-04-20
Supplement: s1 [file s1]

# Implementation of Precision Oncology for Patients with Metastatic Breast Cancer in an Interdisciplinary MTB Setting

Elena Sultova <sup>1</sup>, C. Benedikt Westphalen <sup>2</sup>, Andreas Jung <sup>3</sup>, Joerg Kumbrink <sup>3</sup>, Thomas Kirchner <sup>3</sup>, Doris Mayr <sup>3</sup>, Martina Rudelius <sup>3</sup>, Steffen Ormanns <sup>3</sup>, Volker Heinemann <sup>2</sup>, Klaus H. Metzeler <sup>2</sup>, Philipp A. Greif <sup>2</sup>, Anna Hester <sup>1</sup>, Sven Mahner <sup>1,4</sup>, Nadia Harbeck <sup>1,5</sup> and Rachel Wuerstlein <sup>1,4,5,\*</sup>

**Table S1. List of Gene Targets in Oncomine Comprehensive Assay v3—161 gene panel.**

| Hotspot Genes                        |        |          |        |         |         |
|--------------------------------------|--------|----------|--------|---------|---------|
| AKT1                                 | CTNNB1 | GATA2    | KNSTRN | NFE2L2  | RHOA    |
| AKT2                                 | DDR2   | GNA11    | KRAS   | NRAS    | ROS1    |
| AKT3                                 | EGFR   | GNAQ     | MAGOH  | NTRK1   | SF3B1   |
| ALK                                  | ERBB2  | GNAS     | MAP2K1 | NTRK2   | SMAD4   |
| AR                                   | ERBB3  | H3F3A    | MAP2K2 | NTRK3   | SMO     |
| ARAF                                 | ERBB4  | HIST1H3B | MAP2K4 | PDGFRA  | SPOP    |
| AXL                                  | ERCC2  | HNF1A    | MAPK1  | PDGFRB  | SRC     |
| BRAF                                 | ESR1   | HRAS     | MAX    | PIK3CB  | STAT3   |
| BTB                                  | EZH2   | IDH1     | MDM4   | PIK3CA  | TERT    |
| CBL                                  | FGFR1  | IDH2     | MED12  | PPP2R1A | TOP1    |
| CCND1                                | FGFR2  | JAK1     | MET    | PTPN11  | U2AF1   |
| CDK4                                 | FGFR3  | JAK2     | MTOR   | RAC1    | XPO1    |
| CDK6                                 | FGFR4  | JAK3     | MYC    | RAF1    |         |
| CHEK2                                | FLT3   | KDR      | MYCN   | RET     |         |
| CSF1R                                | FOXL2  | KIT      | MYD88  | RHEB    |         |
| Full-Length Genes                    |        |          |        |         |         |
| ARID1A                               | CDKN1B | FBXW7    | NOTCH1 | PTEN    | SETD2   |
| ATM                                  | CDKN2A | MLH1     | NOTCH2 | RAD50   | SLX4    |
| ATR                                  | CDKN2B | MRE11    | NOTCH3 | RAD51   | SMARCA4 |
| ATRX                                 | CHEK1  | MSH6     | PALB2  | RAD51B  | SMARCB1 |
| BAP1                                 | CREBBP | MSH2     | PIK3R1 | RAD51C  | STK11   |
| BRCA1                                | FANCA  | NBN      | PMS2   | RAD51D  | TP53    |
| BRCA2                                | FANCD2 | NF1      | POLE   | RNF43   | TSC1    |
| CDK12                                | FANCI  | NF2      | PTCH1  | RB1     | TSC3    |
| Copy Number Genes                    |        |          |        |         |         |
| AKT1                                 | CCND2  | ESR1     | IGF1R  | MYCN    | PPARG   |
| AKT2                                 | CCND3  | FGF19    | KIT    | NTRKN1  | RICTOR  |
| AKT3                                 | CCNE1  | FGF3     | KRAS   | NTRK2   | TERT    |
| ALK                                  | CDK2   | FGFR1    | MDM2   | NTRK3   |         |
| AXL                                  | CDK4   | FGFR2    | MDM4   | PDGFRA  |         |
| AR                                   | CDK6   | FGFR3    | MET    | PDGFRB  |         |
| BRAF                                 | EGFR   | FGFR4    | MYC    | PIK3CB  |         |
| CCND1                                | ERBB2  | FLT3     | MYCL   | PIK3CA  |         |
| Gene Fusions (Inter- and Intragenic) |        |          |        |         |         |
| AKT2                                 | ERBB2  | FGFR3    | NF1    | PDGFRB  | RELA    |

|               |              |              |               |               |              |
|---------------|--------------|--------------|---------------|---------------|--------------|
| <i>ALK</i>    | <i>ERBB4</i> | <i>FGR</i>   | <i>NOTCH1</i> | <i>PIK3CA</i> | <i>RET</i>   |
| <i>AR</i>     | <i>ERG</i>   | <i>FLT3</i>  | <i>NOTCH4</i> | <i>PRKACA</i> | <i>ROS1</i>  |
| <i>AXL</i>    | <i>ESR1</i>  | <i>JAK2</i>  | <i>NRG1</i>   | <i>PRKACB</i> | <i>RSPO2</i> |
| <i>BRCA1</i>  | <i>ETV1</i>  | <i>KRAS</i>  | <i>NTRK1</i>  | <i>PTEN</i>   | <i>RSPO3</i> |
| <i>BRCA2</i>  | <i>ETV4</i>  | <i>MDM4</i>  | <i>NTRK2</i>  | <i>PPARG</i>  | <i>TERT</i>  |
| <i>BRAF</i>   | <i>ETV5</i>  | <i>MET</i>   | <i>NTRK3</i>  | <i>RAD51B</i> |              |
| <i>CDKN2A</i> | <i>FGFR1</i> | <i>MYB</i>   | <i>NUTM1</i>  | <i>RAF1</i>   |              |
| <i>EGFR</i>   | <i>FGFR2</i> | <i>MYBL1</i> | <i>PDGFRA</i> | <i>RB1</i>    |              |

**Table S2. List of Gene Targets in Oncomine Focus Assay—52 gene panel.**

| Hotspot Genes |              |               |               |
|---------------|--------------|---------------|---------------|
| <i>ABL1</i>   | <i>ERBB2</i> | <i>GNAQ</i>   | <i>MYC</i>    |
| <i>AKT1</i>   | <i>ERBB4</i> | <i>HRAS</i>   | <i>MYCN</i>   |
| <i>AKT3</i>   | <i>ERBB3</i> | <i>IDH1</i>   | <i>NRAS</i>   |
| <i>ALK</i>    | <i>ERG</i>   | <i>IDH2</i>   | <i>NTRK1</i>  |
| <i>AR</i>     | <i>ESR1</i>  | <i>JAK1</i>   | <i>NTRK2</i>  |
| <i>AXL</i>    | <i>ETV1</i>  | <i>JAK2</i>   | <i>NTRK3</i>  |
| <i>BRAF</i>   | <i>ETV4</i>  | <i>JAK3</i>   | <i>PDGFRA</i> |
| <i>CCND1</i>  | <i>ETV5</i>  | <i>KIT</i>    | <i>PIK3CA</i> |
| <i>CDK4</i>   | <i>FGFR1</i> | <i>KRAS</i>   | <i>PPARG</i>  |
| <i>CDK6</i>   | <i>FGFR2</i> | <i>MAP2K1</i> | <i>RAF1</i>   |
| <i>CTNNB1</i> | <i>FGFR3</i> | <i>MAP2K2</i> | <i>RET</i>    |
| <i>DDR2</i>   | <i>FGFR4</i> | <i>MET</i>    | <i>ROS1</i>   |
| <i>EGFR</i>   | <i>GNA11</i> | <i>MTOR</i>   | <i>SMO</i>    |
